# Supplementary material for: Preparation of an interpenetrating bimetal metal–organic framework via metal metathesis used for promoting gas adsorption
Source: Royal Society of Chemistry journal article supplement (doi:10.1039/d2qi00860b), 2022-01-01
Supplement: d2qi00860b1.pdf [file d2qi00860b1.pdf]

## *Electronic Supporting Information (ESI)*

# **Preparation of an interpenetrating bimetal metal-organic framework via metal metathesis used for promoting gas adsorption†**

Feifei Zhang<sup>a</sup>, Yingying Zhang<sup>a</sup>, Xiaoqing Wang<sup>a,b\*</sup>, Jinping Li<sup>a,b,c</sup> and Jiangfeng Yang<sup>a,b,c\*</sup>

<sup>a</sup> Research Institute of Special Chemicals, College of Chemistry and Chemical Engineering, Taiyuan University of Technology, Taiyuan 030024, Shanxi, China

<sup>b</sup> Shanxi Key Laboratory of Gas Energy Efficient and Clean Utilization, Taiyuan 030024, Shanxi, China

<sup>c</sup> Shanxi-Zheda Institute of Advanced Materials and Chemical Engineering, Taiyuan 030002, Shanxi, China

\*Corresponding author: E-mail: [wangxiaoqing@tyut.edu.cn](mailto:wangxiaoqing@tyut.edu.cn), [yangjiangfeng@tyut.edu.cn](mailto:yangjiangfeng@tyut.edu.cn)

# Experimental Section

## 1. Raw materials

Scandium nitrate hydrate ( $\text{Sc}(\text{NO}_3)_3 \cdot x\text{H}_2\text{O}$ , 99%), chromic chloride hexahydrate ( $\text{CrCl}_3 \cdot 6\text{H}_2\text{O}$ , 99%) and biphenyl dicarboxylic acid (BPDC- $\text{H}_2$ , 98%) were purchased from Shanghai Aladdin Biochemical Technology Co., Ltd. N, N-dimethylformamide (DMF, 99%), acetone ( $\text{CH}_3\text{COCH}_3$ , 99%) and hydrochloric acid (HCl, 36%) provided by Sinopharm Chemical Reagent Co., Ltd. The above reagents were used directly without further purification.

## 2. Fitting of pure component isotherms

The single-component  $\text{CO}_2$ ,  $\text{N}_2\text{O}$  and  $\text{C}_2\text{H}_2$  and adsorption isotherms of MIL-126(Sc) and MIL-126(Cr/Sc) were fitted using the dual-site Langmuir-Freundlich (DSLFL) model, and  $R^2$  was greater than 0.9999.

$$q = q_1 \frac{b_1 P^{1/n_1}}{1 + b_1 P^{1/n_1}} + q_2 \frac{b_2 P^{1/n_2}}{1 + b_2 P^{1/n_2}} \quad (1)$$

Where  $q$  is the equilibrium adsorbed amount of an adsorbent (mmol/g);  $q_1$  and  $q_2$  are the saturation uptakes of site 1 and site 2 (mmol/g);  $b_1$  and  $b_2$  are the affinity coefficients of site 1 and site 2 (1/bar);  $n_1$  and  $n_2$  are the corresponding deviations from an ideal homogeneous surface.

## 3. Qst calculation

The Qst of MIL-126(Sc) and MIL-126(Cr/Sc) with  $\text{CO}_2$ ,  $\text{N}_2\text{O}$  and  $\text{C}_2\text{H}_2$  were calculated using the  $\text{C}_2\text{H}_2$  and  $\text{CO}_2$  single-component adsorption isotherms at 273 K and 298 K via the Clausius-Clapeyron equation.

$$\ln \frac{P_2}{P_1} = \frac{\Delta H}{R} \left( \frac{1}{T_1} - \frac{1}{T_2} \right) \quad (2)$$

In the above equation,  $P$  represents the pressure, the unit is bar,  $T$  is the temperature in K, and  $R$  is the gas constant (8.314).

## Supporting Table and Figures

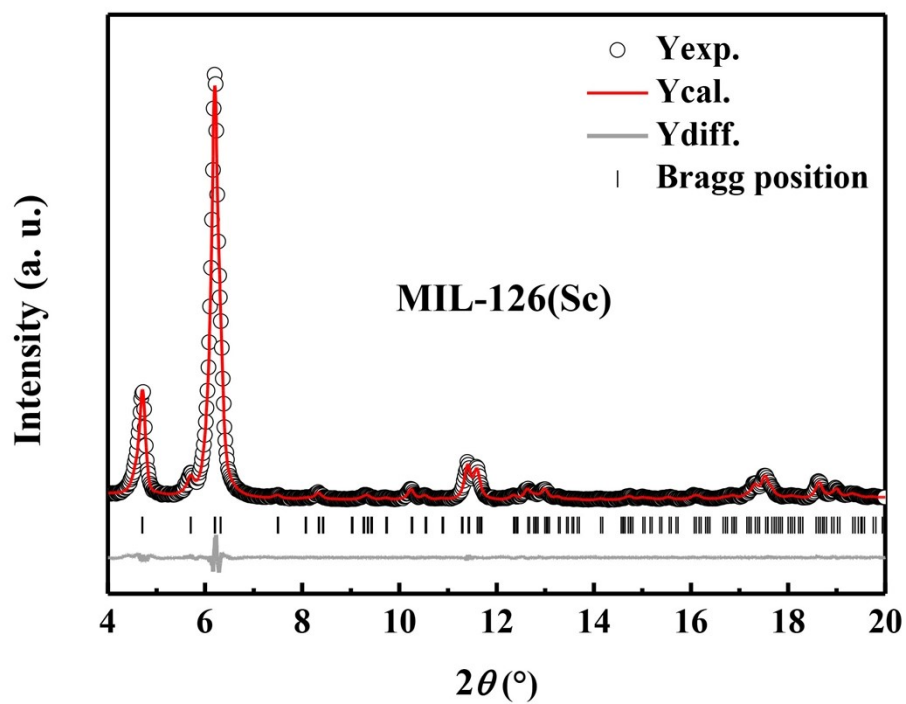

**Fig. S1** Rietveld-refined XRD pattern of MIL-126(Sc) ( $R_{wp} = 4.73\%$ ,  $R_p = 3.56\%$ ,  $GOF = 1.06$ ,  $a = b = 21.91 \text{ \AA}$ ,  $c = 36.35 \text{ \AA}$ ,  $\alpha = \beta = 90^\circ$ ,  $\gamma = 90^\circ$ ). The black circles and red lines represent experimental data and calculated values, respectively.

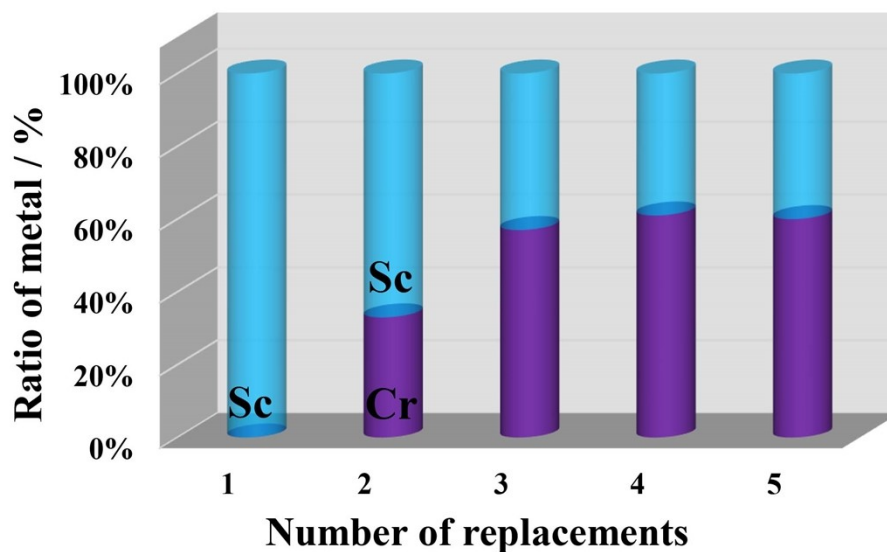

**Fig. S2** Change of metal ratio ( $n/n_{\text{total}}$  %) in MIL-126 for different exchange times under standard conditions. The exchange time is 3 h for one exchange process. Obviously, the exchange ratio of Cr(III) increased rapidly in the first 3 times and then showed no obvious change.

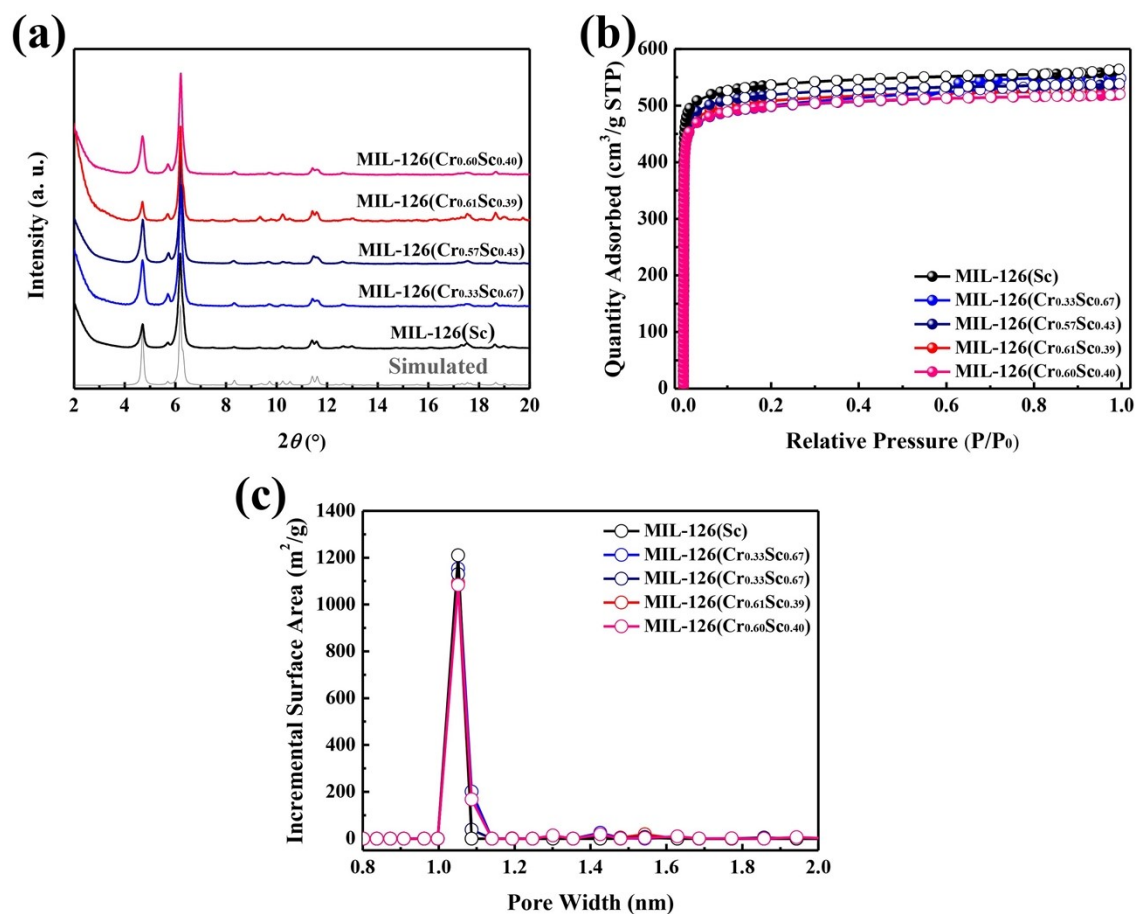

**Fig. S3** PXRD (a),  $N_2$  adsorption-desorption isotherms at 77 K (b) and pore size distribution (c) of MIL-126(Sc) and the modified materials.

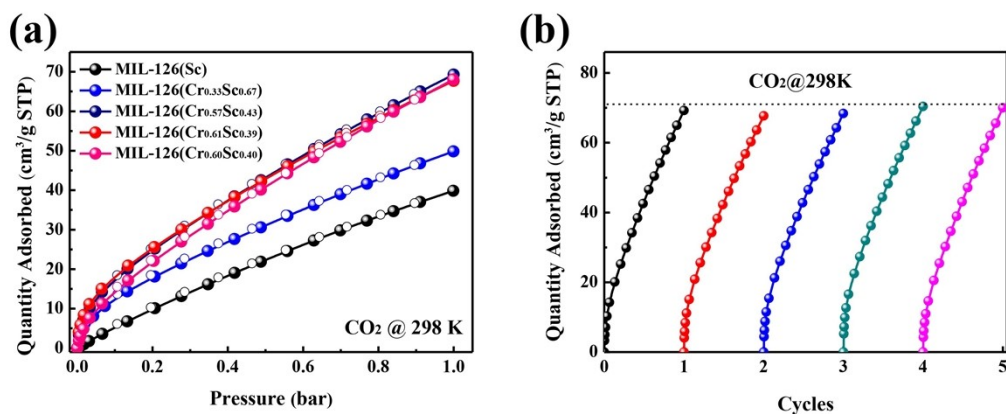

**Fig. S4** (a) CO<sub>2</sub> adsorption-desorption isotherms at 298 K of MIL-126(Sc) and the modified materials. (b) CO<sub>2</sub> adsorption cycles of MIL-126(Cr/Sc) at 298 K and 1 bar. Note: MIL-126(Cr<sub>0.61</sub>Sc<sub>0.39</sub>) is marked as MIL-126(Cr/Sc) for clarity in this work.

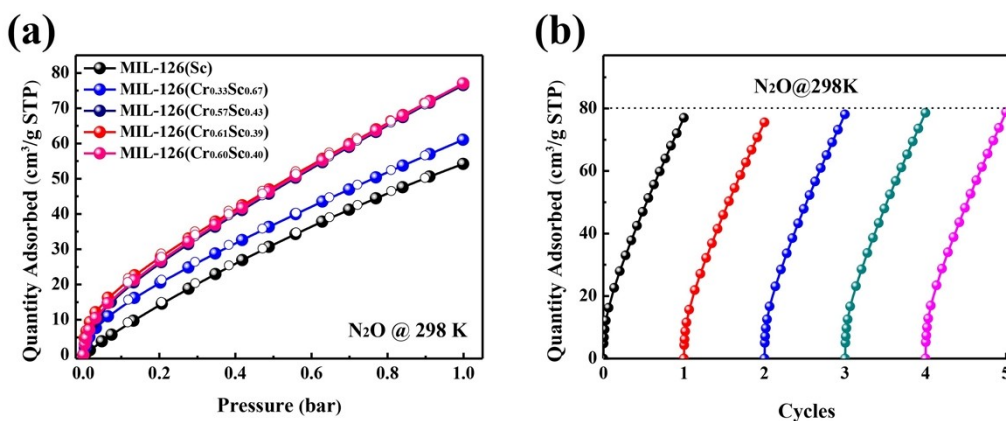

**Fig. S5** (a) N<sub>2</sub>O adsorption-desorption isotherms at 298 K of MIL-126(Sc) and the modified materials. (b) N<sub>2</sub>O adsorption cycles of MIL-126(Cr/Sc) at 298 K and 1 bar.

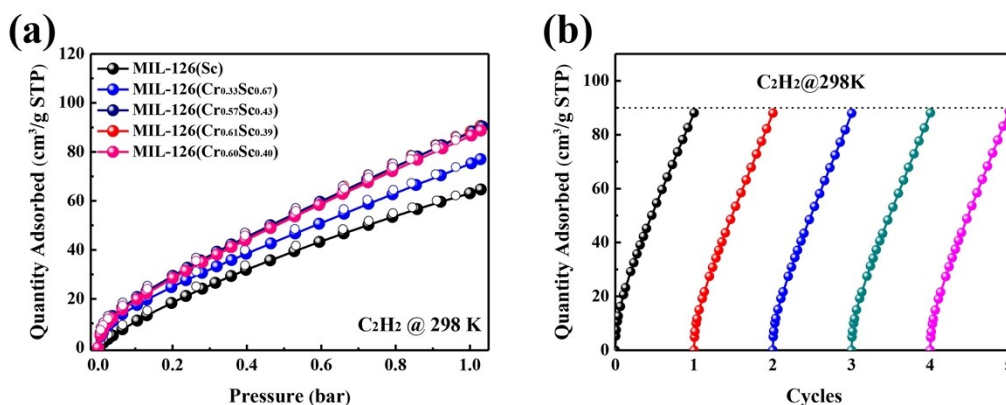

**Fig. S6** (a) C<sub>2</sub>H<sub>2</sub> adsorption-desorption isotherms at 298 K of MIL-126(Sc) and the modified materials. (b) C<sub>2</sub>H<sub>2</sub> adsorption cycles of MIL-126(Cr/Sc) at 298 K and 1 bar.

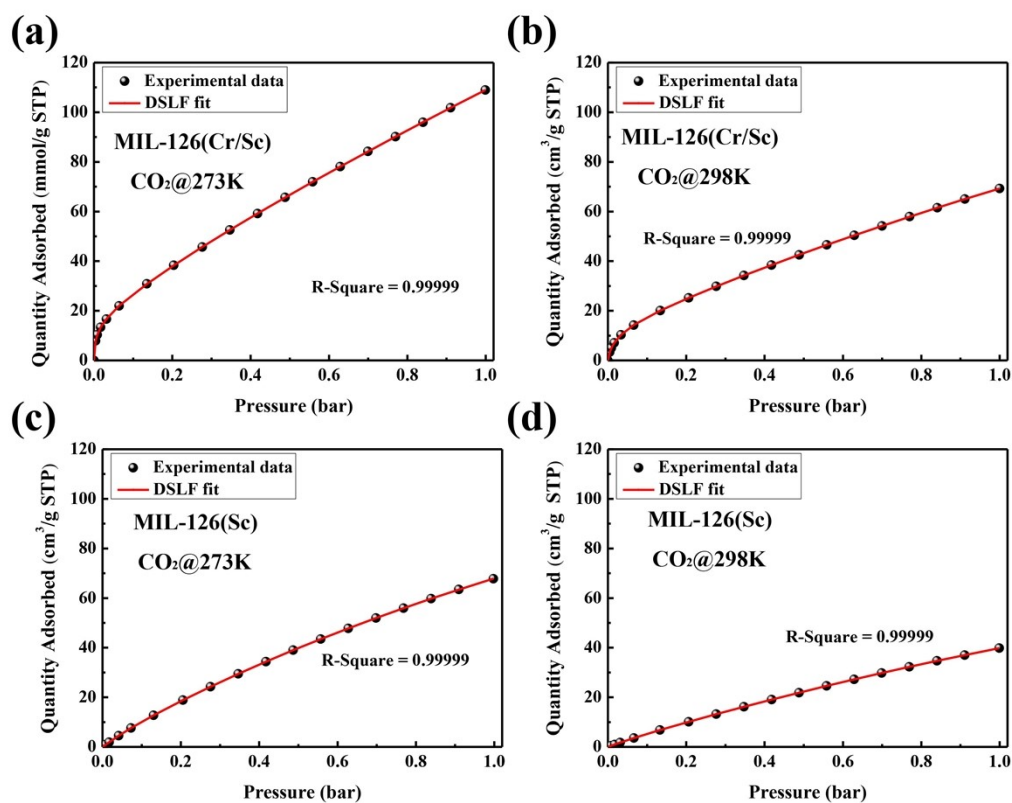

Fig. S7 DSLF fit of CO<sub>2</sub> adsorption isotherms in MIL-126(Sc) and MIL-126(Cr/Sc).

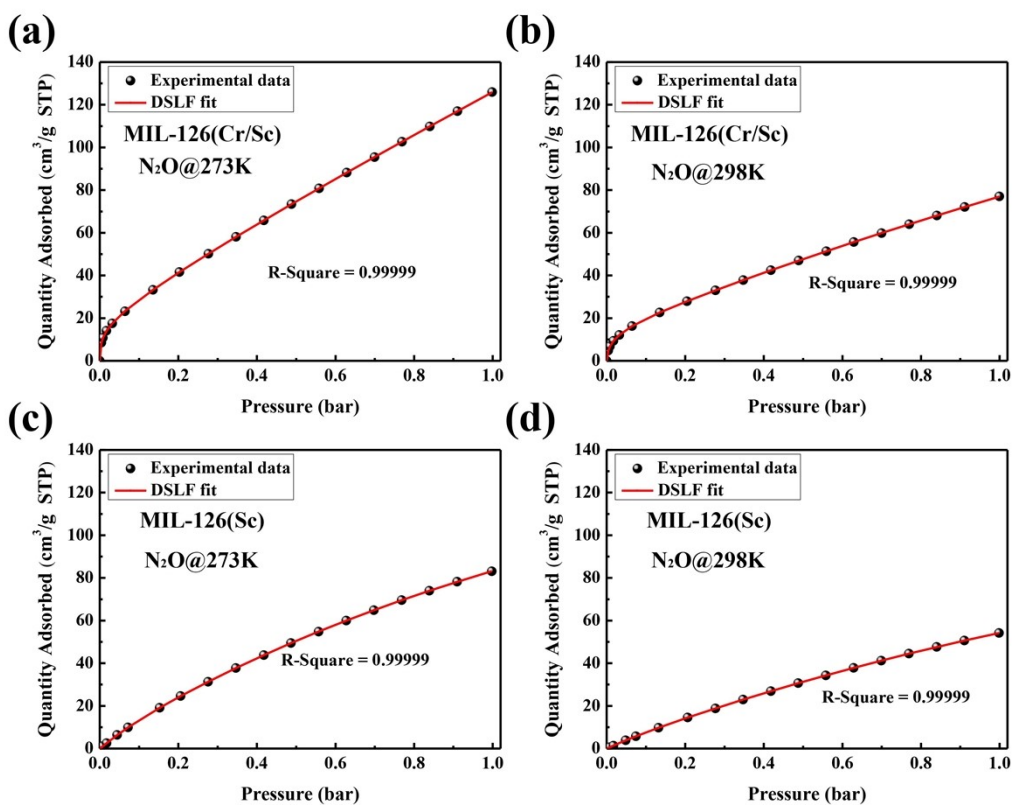

Fig. S8 DSLF fit of N<sub>2</sub>O adsorption isotherms in MIL-126(Sc) and MIL-126(Cr/Sc).

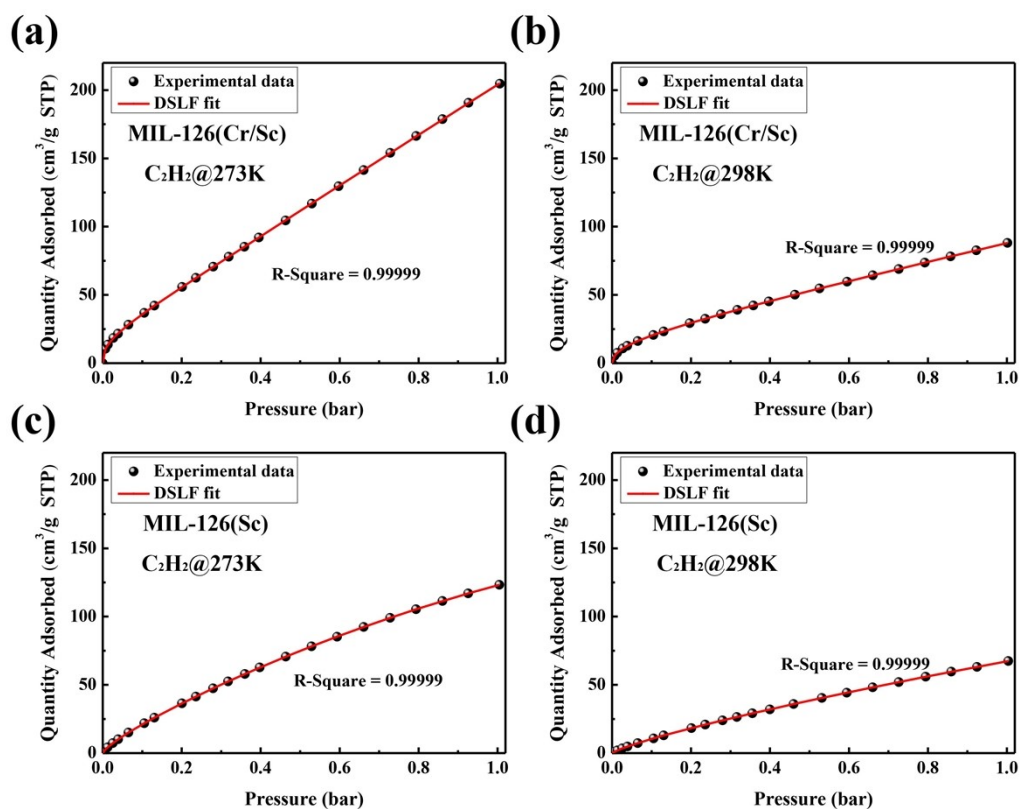

Fig. S9 DSLF fit of  $C_2H_2$  adsorption isotherms in MIL-126(Sc) and MIL-126(Cr/Sc).



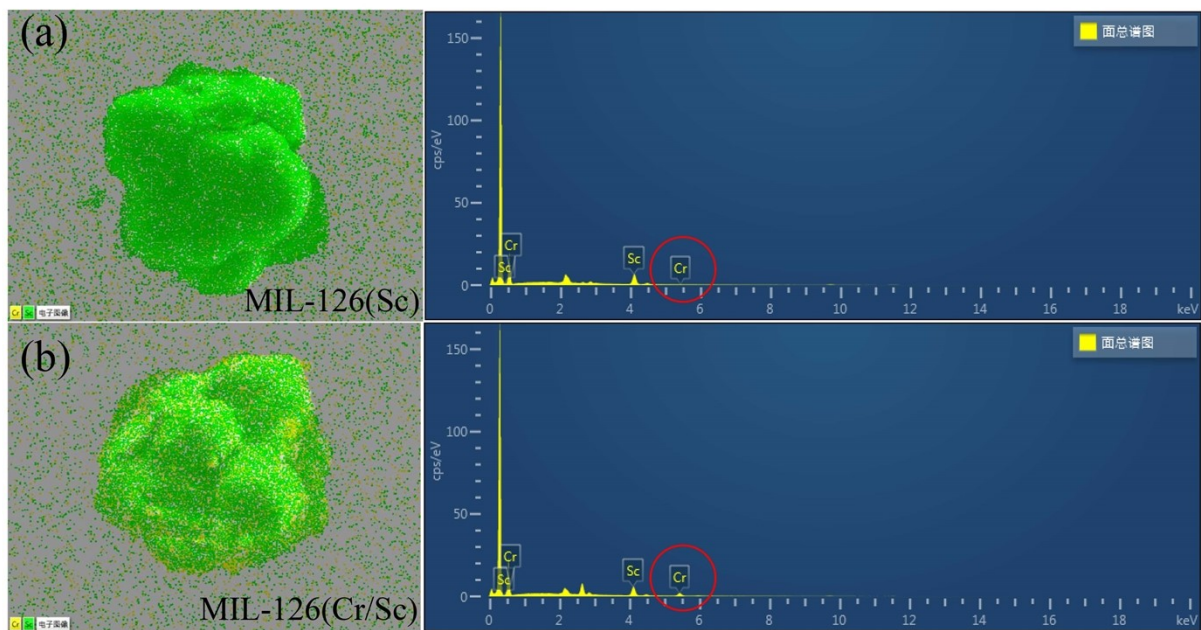

Fig. S10 Elemental mapping images and element analysis for MIL-126(Sc) and MIL-126(Cr/Sc) by EDX.

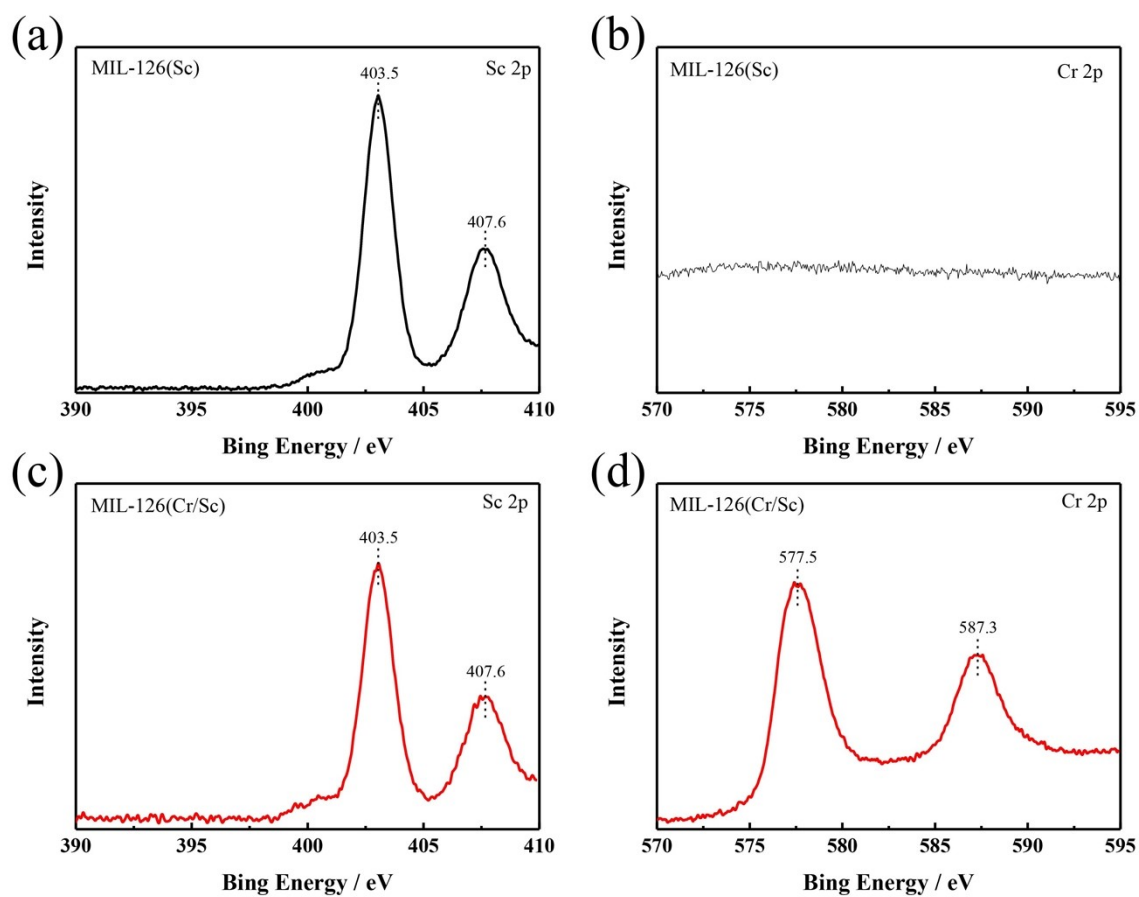

Fig. S11 Local XPS spectra of MIL-126(Sc) and MIL-126(Cr/Sc): Sc 2p and Cr 2p spectra.

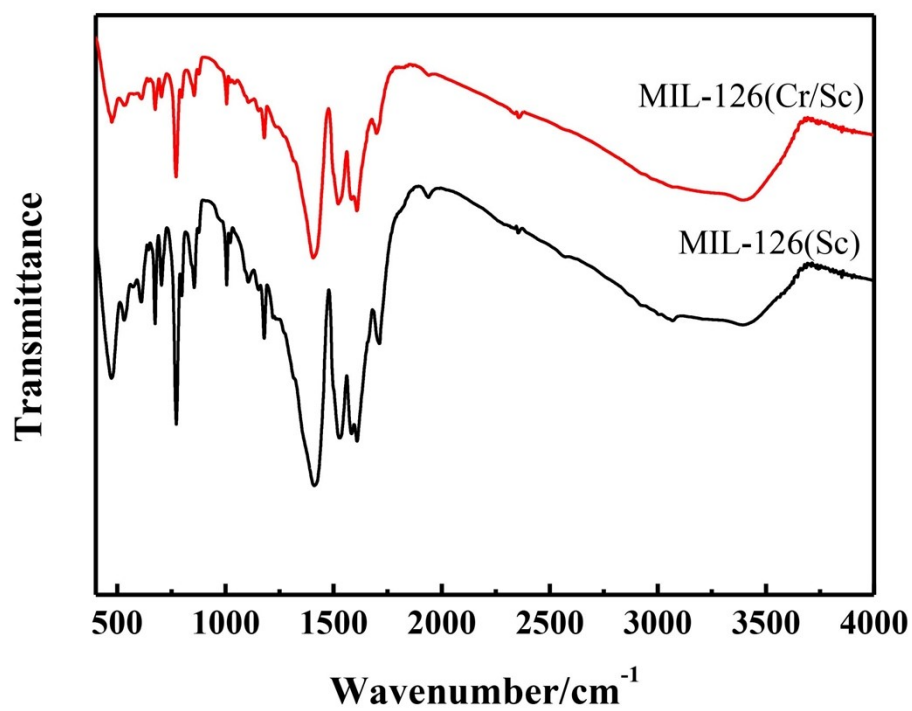

**Fig. S12** FTIR spectra of MIL-126(Sc) and MIL-126(Cr/Sc).

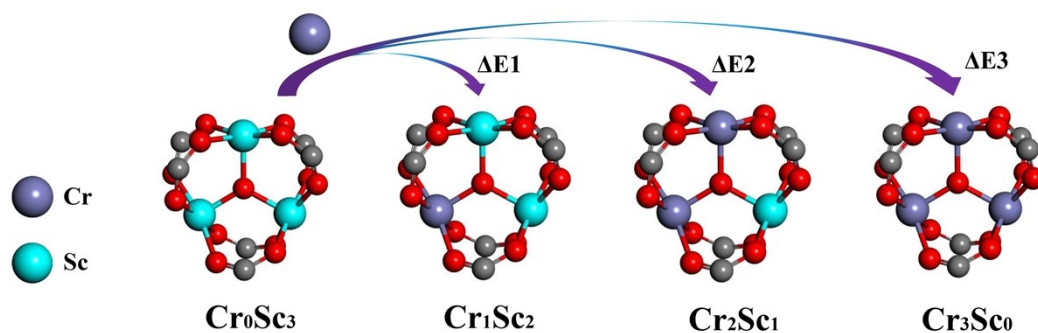

|                          | $E_0/\text{eV}$ | $E_{\text{Cr\_atom}}/\text{eV}$ | $E_{\text{Sc\_atom}}/\text{eV}$ | $\Delta E/\text{eV}$ |
|--------------------------|-----------------|---------------------------------|---------------------------------|----------------------|
| $\text{Cr}_0\text{Sc}_3$ | -165.40         |                                 |                                 |                      |
| $\text{Cr}_1\text{Sc}_2$ | -163.32         | -0.88                           | -1.82                           | 1.14                 |
| $\text{Cr}_2\text{Sc}_1$ | -161.65         | -0.88                           | -1.82                           | 1.88                 |
| $\text{Cr}_3\text{Sc}_0$ | -160.30         | -0.88                           | -1.82                           | 2.28                 |

**Fig. S13** Formation energy of  $\text{Cr}_n\text{Sc}_{3-n}$  ( $n = 1, 2, 3$ ). The formation energy value was determined by DFT calculation based on the formula:  $\Delta E = E_0(\text{Cr}_n\text{Sc}_{3-n}) + n \cdot E_{\text{Sc\_atom}} - n \cdot E_{\text{Cr\_atom}} - E_0(\text{Cr}_0\text{Sc}_3)$ .

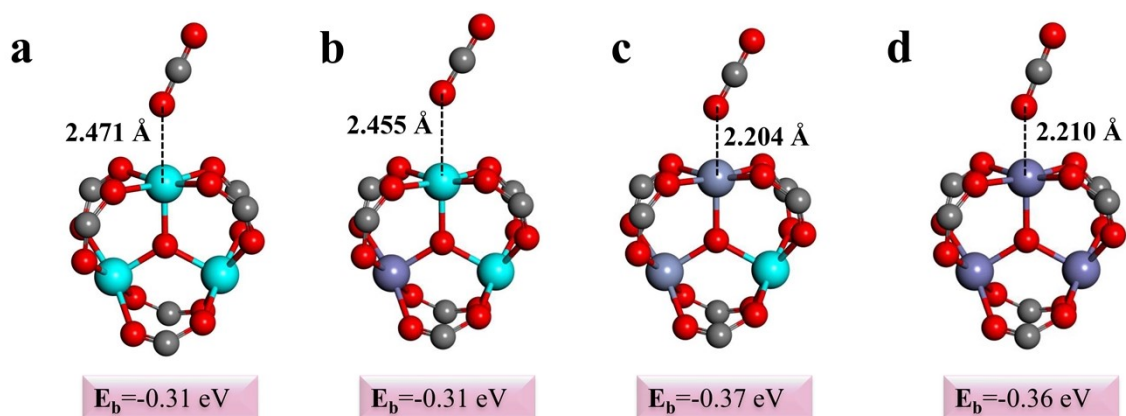

**Fig. S14** The DFT-calculated adsorption configurations of  $\text{CO}_2$  on the open metal sites in MIL-126 with different Cr content using a cluster model (Cr: light purple; Sc: cyan; C: grey; O: red).

**Table S1.** DSLF fit parameters for CO<sub>2</sub> in MIL-126(Cr/Sc) and MIL-126(Sc).

| Adsorbents     | T. T. <sup>[a]</sup> | q <sub>1</sub> | b <sub>1</sub> | n <sub>1</sub> | q <sub>2</sub> | b <sub>2</sub> | n <sub>2</sub> |
|----------------|----------------------|----------------|----------------|----------------|----------------|----------------|----------------|
| MIL-126(Cr/Sc) | 273                  | 1.76E1         | 1.98E1         | 1.61           | 3.01E3         | 3.16E-2        | 1.12           |
| MIL-126(Cr/Sc) | 298                  | 2.71E2         | 2.42E-1        | 0.91           | 1.75E1         | 1.35E1         | 1.30           |
| MIL-126(Sc)    | 273                  | 2.26E2         | 0.39E-1        | 0.94           | 4.72E0         | 1.58E1         | 0.91           |
| MIL-126(Sc)    | 298                  | 1.20E1         | 0.39E-1        | 0.81           | 6.79E0         | 5.37E0         | 1.04           |

**Table S2.** DSLF fit parameters for N<sub>2</sub>O in MIL-126(Cr/Sc) and MIL-126(Sc).

| Adsorbents     | Gas | q <sub>1</sub> | b <sub>1</sub> | n <sub>1</sub> | q <sub>2</sub> | b <sub>2</sub> | n <sub>2</sub> |
|----------------|-----|----------------|----------------|----------------|----------------|----------------|----------------|
| MIL-126(Cr/Sc) | 273 | 2.15E1         | 9.55E0         | 1.93           | 2.56E5         | 4.15E-4        | 1.08           |
| MIL-126(Cr/Sc) | 298 | 2.02E1         | 8.93E0         | 1.59           | 4.54E2         | 1.49E-1        | 0.95           |
| MIL-126(Sc)    | 273 | 1.16E1         | 1.08E1         | 0.94           | 2.01E2         | 5.63E-1        | 0.87           |
| MIL-126(Sc)    | 298 | 1.55E2         | 4.42E-1        | 0.85           | 7.48E0         | 7.74E0         | 0.97           |

**Table S3.** DSLF fit parameters for C<sub>2</sub>H<sub>2</sub> in MIL-126(Cr/Sc) and MIL-126(Sc).

| Adsorbents     | Gas | q <sub>1</sub> | b <sub>1</sub> | n <sub>1</sub> | q <sub>2</sub> | b <sub>2</sub> | n <sub>2</sub> |
|----------------|-----|----------------|----------------|----------------|----------------|----------------|----------------|
| MIL-126(Cr/Sc) | 273 | 3.82E4         | 1.66E-3        | 2.70           | 1.55E3         | 1.00E-2        | 0.80           |
| MIL-126(Cr/Sc) | 298 | 2.07E1         | 5.59E0         | 1.71           | 1.31E5         | 5.37E-4        | 1.05           |
| MIL-126(Sc)    | 273 | 9.94E1         | 1.22E0         | 1.30           | 1.75E2         | 6.40E-1        | 0.70           |
| MIL-126(Sc)    | 298 | 4.14E0         | 8.94E0         | 1.13           | 6.16E2         | 1.14E-1        | 1.07           |

[a]: "T. T." stands for test temperature, the unit is "K".

**Table S4.** Summary of the adsorption uptake (298 K, 1bar), selectivity and heat of adsorption data for top-performing C<sub>2</sub>H<sub>2</sub>-selective materials.

| Adsorbents                     | C <sub>2</sub> H <sub>2</sub> (cm <sup>3</sup> g <sup>-1</sup> ) | Qst (kJmol <sup>-1</sup> ) <sup>a</sup> | Ref.             |
|--------------------------------|------------------------------------------------------------------|-----------------------------------------|------------------|
| MOF-OH                         | 68                                                               | 17                                      | 1                |
| MOF-NH <sub>2</sub>            | 60                                                               | 16                                      | 1                |
| ATC-Cu                         | 112                                                              | 79                                      | 2                |
| FeNi-M'MOF                     | 96                                                               | 27                                      | 3                |
| JCM-1                          | 75                                                               | 37                                      | 4                |
| DICRO-4-Ni-i                   | 43                                                               | 37                                      | 5                |
| HOF-3a                         | 47                                                               | 19                                      | 6                |
| CuI@UiO-66-(COOH) <sub>2</sub> | 51                                                               | 74                                      | 7                |
| ZJU-74a                        | 86                                                               | 45                                      | 8                |
| Zn <sub>2</sub> (bpy)(btec)    | 55                                                               | 29                                      | 9                |
| NKMOF-1-Ni                     | 61                                                               | 60                                      | 10               |
| UTSA-74a                       | 107.4                                                            | 31                                      | 11               |
| FJU-36a                        | 56                                                               | 33                                      | 12               |
| SIFSIX-21-Ni                   | 91                                                               | 38                                      | 13               |
| MUF-17                         | 67                                                               | 49                                      | 14               |
| Zn-MOF-74                      | 122 <sup>b</sup>                                                 | 31                                      | 10               |
| CAU-10                         | 90                                                               | 27                                      | 15               |
| UTSA-300a                      | 69                                                               | 57                                      | 16               |
| Cu@FAU                         | 79.5                                                             | 50                                      | 17               |
| 1a                             | 79.5                                                             | 28.2                                    | 18               |
| FJU-90a                        | 180                                                              | 25                                      | 19               |
| <b>MIL-126(Cr/Sc)</b>          | <b>88</b>                                                        | <b>37</b>                               | <b>This work</b> |

[a] Qst at Zero Coverage for C<sub>2</sub>H<sub>2</sub>. [b] obtained at 295 K.

**Table S5.** Comparison of thermal stability of Cr-based tricyclic MOFs.

| Adsorbents      | BET (m <sup>2</sup> g <sup>-1</sup> ) | Thermal stability (°C) | Ref.             |
|-----------------|---------------------------------------|------------------------|------------------|
| MIL-126(Cr/Sc)  | 1354                                  | 450                    | <b>This work</b> |
| Cr-SXU-1        | 4036                                  | 420                    | 20               |
| TYUT-96Cr       | 632                                   | 375                    | 21               |
| PCN-333(Cr)     | 2548                                  | 300                    | 22               |
| PCN-426(Cr)     | 3155                                  | 300                    | 23               |
| MIL-100(Cr)     | 1950                                  | 300                    | 21               |
| MIL-101(Cr)-NDC | 2100                                  | 300                    | 24               |
| MIL-101(Cr)     | 4100                                  | 275                    | 25               |

**Table S6.** Summary of some top-performing MOFs for CO<sub>2</sub> adsorption at 1 bar or 1 atm as noted.

| Sample                | S <sub>A</sub> BET<br>(cm <sup>3</sup> /g) | CO <sub>2</sub> uptake<br>(cm <sup>3</sup> /g) 273 K | CO <sub>2</sub> uptake<br>(cm <sup>3</sup> /g) 298 K | Q <sub>st</sub><br>(kJ/mol) | Ref.             |
|-----------------------|--------------------------------------------|------------------------------------------------------|------------------------------------------------------|-----------------------------|------------------|
| ZJU-12                | 2316                                       | 237                                                  | 131                                                  | 28                          | 26               |
| CPM-231               | 1140                                       | 232                                                  | 152                                                  | 20                          | 27               |
| Mg-MOF-74             | 1495                                       | 229                                                  | 180                                                  | 47                          | 28               |
| Cu(TDPTA)             | 1938                                       | 227                                                  | 131                                                  | 42                          | 29               |
| MFM-188               | 2568                                       | 216                                                  | 121                                                  | 21                          | 30               |
| Cu-tpbtm              | 3160                                       | 217                                                  | 119                                                  | 26                          | 31               |
| CPM-200-Fe/Mg         | 1459                                       | 208                                                  | 127                                                  | 34                          | 32               |
| NOTT-125              | 2471                                       | 204                                                  | 93                                                   | 25                          | 33               |
| SIFSIX-1-Cu           | 1468                                       | 183                                                  | 118                                                  | 27                          | 34               |
| CPM-733-dps           | 1883                                       | 238                                                  | 124                                                  | 27                          | 35               |
| CPM-733               | 1328                                       | 171                                                  | 87                                                   | 24                          | 35               |
| ZSM-5                 | 420                                        | /                                                    | 33                                                   | /                           | 36               |
| 13X                   | 488                                        | /                                                    | 38                                                   | /                           | 37               |
| AC                    | /                                          | /                                                    | 49                                                   | /                           | 38               |
| UIO-66                | 1525                                       | /                                                    | 40                                                   | 25                          | 39               |
| MOF-5                 | 2304                                       | /                                                    | 47                                                   | 34                          | 40               |
| MIL-100(Cr)           | 2153                                       | /                                                    | 52                                                   | /                           | 41               |
| <b>MIL-126(Cr/Sc)</b> | <b>1354</b>                                | <b>109</b>                                           | <b>69</b>                                            | <b>40</b>                   | <b>This work</b> |

**Table S7.** Summary of some top-performing MOFs for N<sub>2</sub>O adsorption at 1 bar or 1 atm as noted.

| Sample                | S <sub>A</sub> BET<br>(cm <sup>3</sup> /g) | N <sub>2</sub> O uptake<br>(cm <sup>3</sup> /g) 273 K | N <sub>2</sub> O uptake<br>(cm <sup>3</sup> /g) 298 K | Q <sub>st</sub><br>(kJ/mol) | Ref.             |
|-----------------------|--------------------------------------------|-------------------------------------------------------|-------------------------------------------------------|-----------------------------|------------------|
| MOF-5                 | 839                                        | /                                                     | 20.40                                                 | /                           | 42               |
| Ni-MOF                | 447                                        | 77                                                    | 63.00                                                 | 26                          | 43               |
| ZIF-7                 | 312                                        | /                                                     | 56.01                                                 | /                           | 44               |
| UIO-66                | 1390                                       | /                                                     | 96.60                                                 | /                           | 45               |
| ZIF-8                 | 1630                                       | /                                                     | 31.10                                                 | /                           | 45               |
| HKUST-1               | 1850                                       | /                                                     | 87.60                                                 | /                           | 45               |
| MIL-100Cr             | 2118                                       | 184.5                                                 | 129.40                                                | 80                          | 45               |
| ELM-11                | 621                                        | 100.8                                                 | 89.60                                                 | 32                          | 46               |
| ELM-12                | 706                                        | 78.4                                                  | 67.20                                                 | 36                          | 46               |
| MIL-53Al              | 1519                                       | 56                                                    | 60.48                                                 | 25                          | 46               |
| MIL-100Fe-300         | 2227                                       | 140                                                   | 105.27                                                | 37                          | 47               |
| <b>MIL-126(Cr/Sc)</b> | <b>1354</b>                                | <b>125</b>                                            | <b>77</b>                                             | <b>31</b>                   | <b>This work</b> |

**Table S8.** Adsorption energies of MIL-126(Sc) and MIL-126(Cr/Sc) for the selected gas molecules.

| Gas molecules                 | Adsorption energy (eV) |                |
|-------------------------------|------------------------|----------------|
|                               | MIL-126(Sc)            | MIL-126(Cr/Sc) |
| CO <sub>2</sub>               | -0.31                  | -0.37          |
| C <sub>2</sub> H <sub>2</sub> | -0.37                  | -0.58          |
| N <sub>2</sub> O              | -0.28                  | -0.39          |



**Table S9.** Theoretical calculated concentration of unsaturated metal sites

|                           | Chemical <sup>[a]</sup> Composition                          | Relative Molecular Mass | Unsaturated metal Sites <sup>[b]</sup> (mmol/g) |
|---------------------------|--------------------------------------------------------------|-------------------------|-------------------------------------------------|
| MIL-126(Sc) <sup>48</sup> | Sc <sub>3</sub> O[BPDC] <sub>3</sub> X                       | 913.14                  | 2.19                                            |
| MIL-126(Cr/Sc)            | Cr <sub>1.83</sub> Sc <sub>1.17</sub> O[BPDC] <sub>3</sub> X | <b>925.95</b>           | <b>2.16</b>                                     |

[a]: Coordination water molecule and water in pores were ignored. [b]: Concentration of unsaturated metal sites was calculated based on the relative molecular mass and the percentage of unsaturated metal sites values reported in previous work. X=OH<sup>-</sup> or Cl<sup>-</sup>, here, Cl<sup>-</sup> was used for the calculation of the relative molecular mass.

## References

- 1 W. Gong, H. Cui, Y. Xie, Y. Li, X. Tang, Y. Liu, Y. Cui and B. Chen, Efficient C<sub>2</sub>H<sub>2</sub>/CO<sub>2</sub> Separation in Ultramicroporous Metal-Organic Frameworks with Record C<sub>2</sub>H<sub>2</sub> Storage Density, *J. Am. Chem. Soc.*, 2021, **143**, 14869-14876.
- 2 Z. Niu, X. Cui, T. Pham, G. Verma, P. C. Lan, C. Shan, H. Xing, K. A. Forrest, S. Suepaul, B. Space, A. Nafady, A. M. Al-Enizi and S. Ma, A MOF-based Ultra-Strong Acetylene Nano-trap for Highly Efficient C<sub>2</sub>H<sub>2</sub>/CO<sub>2</sub> Separation, *Angew. Chem. Int. Ed.*, 2021, **60**, 5283-5288.
- 3 J. Gao, X. Qian, R.-B. Lin, R. Krishna, H. Wu, W. Zhou and B. Chen, Mixed Metal-Organic Framework with Multiple Binding Sites for Efficient C<sub>2</sub>H<sub>2</sub>/CO<sub>2</sub> Separation, *Angew. Chem. Int. Ed.*, 2020, **59**, 4396-4400.
- 4 J. Lee, C. Y. Chuah, J. Kim, Y. Kim, N. Ko, Y. Seo, K. Kim, T. H. Bae and E. Lee, Separation of Acetylene from Carbon Dioxide and Ethylene by a Water-Stable Microporous Metal-Organic Framework with Aligned Imidazolium Groups inside the Channels, *Angew. Chem. Int. Ed.*, 2018, **57**, 7869-7873.
- 5 H. S. Scott, M. Shivanna, A. Bajpai, D. G. Madden, K.-J. Chen, T. Pham, K. A. Forrest, A. Hogan, B. Space, J. J. Perry and M. J. Zaworotko, Highly Selective Separation of C<sub>2</sub>H<sub>2</sub> from CO<sub>2</sub> by a New Dichromate-Based Hybrid Ultramicroporous Material, *ACS Appl. Mat. Interfaces*, 2017, **9**, 33395-33400.

- 6 P. Li, Y. He, Y. Zhao, L. Weng, H. Wang, R. Krishna, H. Wu, W. Zhou, M. O'Keeffe, Y. Han and B. Chen, A Rod-Packing Microporous Hydrogen-Bonded Organic Framework for Highly Selective Separation of C<sub>2</sub>H<sub>2</sub>/CO<sub>2</sub> at Room Temperature, *Angew. Chem. Int. Ed.*, 2015, **54**, 574-577.
- 7 L. Zhang, K. Jiang, L. Yang, L. Li, E. Hu, L. Yang, K. Shao, H. Xing, Y. Cui, Y. Yang, B. Li, B. Chen and G. Qian, Benchmark C<sub>2</sub>H<sub>2</sub>/CO<sub>2</sub> Separation in an Ultra-Microporous Metal-Organic Framework via Copper(I)-Alkynyl Chemistry, *Angew. Chem. Int. Ed.*, 2021, **60**, 15995-16002.
- 8 J. Pei, K. Shao, J.-X. Wang, H.-M. Wen, Y. Yang, Y. Cui, R. Krishna, B. Li and G. Qian, A Chemically Stable Hofmann-Type Metal-Organic Framework with Sandwich-Like Binding Sites for Benchmark Acetylene Capture, *Adv. Mater.*, 2020, **32**.
- 9 Y. Chen, Y. Du, Y. Wang, R. Krishna, L. Li, J. Yang, J. Li and B. Mu, A stable metal-organic framework with well-matched pore cavity for efficient acetylene separation, *AIChE J.*, 2021, **67**.
- 10 Y.-L. Peng, T. Pham, P. Li, T. Wang, Y. Chen, K.-J. Chen, K. A. Forrest, B. Space, P. Cheng, M. J. Zaworotko and Z. Zhang, Robust Ultramicroporous Metal-Organic Frameworks with Benchmark Affinity for Acetylene, *Angew. Chem. Int. Ed.*, 2018, **57**, 10971-10975.
- 11 F. Luo, C. Yan, L. Dang, R. Krishna, W. Zhou, H. Wu, X. Dong, Y. Han, T.-L. Hu, M. O'Keeffe, L. Wang, M. Luo, R.-B. Lin and B. Chen, UTSA-74: A MOF-74 Isomer with Two Accessible Binding Sites per Metal Center for Highly Selective Gas Separation, *J. Am. Chem. Soc.*, 2016, **138**, 5678-5684.
- 12 L. Liu, Z. Yao, Y. Ye, L. Chen, Q. Lin, Y. Yang, Z. Zhang and S. Xiang, Robustness, Selective Gas Separation, and Nitrobenzene Sensing on Two Isomers of Cadmium Metal-Organic Frameworks Containing Various Metal-O-Metal Chains, *Inorg. Chem.*, 2018, **57**, 12961-12968.
- 13 N. Kumar, S. Mukherjee, N. C. Harvey-Reid, A. A. Bezrukov, K. Tan, V. Martins, M. Vandichel, T. Pham, L. M. van Wyk, K. Oyekan, A. Kumar, K. A. Forrest, K. M. Patil, L. J. Barbour, B. Space, Y. Huang, P. E. Kruger and

- M. J. Zaworotko, Breaking the trade-off between selectivity and adsorption capacity for gas separation, *Chem*, 2021, **7**, 3085-3098.
- 14 O. T. Qazvini, R. Babarao and S. G. Telfer, Multipurpose Metal-Organic Framework for the Adsorption of Acetylene: Ethylene Purification and Carbon Dioxide Removal, *Chem. Mater.*, 2019, **31**, 4919-4926.
- 15 J. Pei, H.-M. Wen, X.-W. Gu, Q.-L. Qian, Y. Yang, Y. Cui, B. Li, B. Chen and G. Qian, Dense Packing of Acetylene in a Stable and Low-Cost Metal-Organic Framework for Efficient C<sub>2</sub>H<sub>2</sub>/CO<sub>2</sub> Separation, *Angew. Chem. Int. Ed.*, 2021, **60**, 25068-25074
- 16 R.-B. Lin, L. Li, H. Wu, H. Arman, B. Li, R.-G. Lin, W. Zhou and B. Chen, Optimized Separation of Acetylene from Carbon Dioxide and Ethylene in a Microporous Material, *J. Am. Chem. Soc.*, 2017, **139**, 8022-8028.
- 17 S. Liu, X. Han, Y. Chai, G. Wu, W. Li, J. Li, I. da Silva, P. Manuel, Y. Cheng, L. L. Daemen, A. J. Ramirez-Cuesta, W. Shi, N. Guan, S. Yang and L. Li, Efficient Separation of Acetylene and Carbon Dioxide in a Decorated Zeolite, *Angew. Chem. Int. Ed.*, 2021, **60**, 6526-6532.
- 18 W.-J. Shi, Y.-Z. Li, J. Chen, R.-H. Su, L. Hou, Y.-Y. Wang and Z. Zhu, A new metal-organic framework based on rare Zn<sub>4</sub>F<sub>4</sub> cores for efficient separation of C<sub>2</sub>H<sub>2</sub>, *Chem. Commun.*, 2021, **57**, 12788-12791.
- 19 Y. Ye, Z. Ma, R.-B. Lin, R. Krishna, W. Zhou, Q. Lin, Z. Zhang, S. Xiang and B. Chen, Pore Space Partition within a Metal-Organic Framework for Highly Efficient C<sub>2</sub>H<sub>2</sub>/CO<sub>2</sub> Separation, *J. Am. Chem. Soc.*, 2019, **141**, 4130-4136.
- 20 J.-H. Wang, Y. Zhang, M. Li, S. Yan, D. Li and X.-M. Zhang, Solvent-Assisted Metal Metathesis: A Highly Efficient and Versatile Route towards Synthetically Demanding Chromium Metal-Organic Frameworks, *Angew. Chem. Int. Ed.*, 2017, **56**, 6478-6482.
- 21 F. Zhang, H. Shang, L. Wang, Y. Wang, J. Yang, Y. Xia, H. Li, L. Li and J. Li, Construction of a Porous Metal-Organic Framework with a High Density of Open Cr Sites for Record N<sub>2</sub>/O<sub>2</sub> Separation, *Adv. Mater.*, 2021, **33**.
- 22 X. Lian, D. Feng, Y.-P. Chen, T.-F. Liu, X. Wang and H.-C. Zhou, The preparation of an ultrastable mesoporous

- Cr(III)-MOF via reductive labilization, *Chem. Sci.*, 2015, **6**, 7044-7048.
- 23 T.-F. Liu, L. Zou, D. Feng, Y.-P. Chen, S. Fordham, X. Wang, Y. Liu and H.-C. Zhou, Stepwise Synthesis of Robust Metal-Organic Frameworks via Postsynthetic Metathesis and Oxidation of Metal Nodes in a Single-Crystal to Single-Crystal Transformation, *J. Am. Chem. Soc.*, 2014, **136**, 7813-7816.
- 24 A. Sonnauer, F. Hoffmann, M. Froeba, L. Kienle, V. Duppel, M. Thommes, C. Serre, G. Ferey and N. Stock, Giant Pores in a Chromium 2,6-Naphthalenedicarboxylate Open-Framework Structure with MIL-101 Topology, *Angew. Chem. Int. Ed.*, 2009, **48**, 3791-3794.
- 25 G. Ferey, C. Mellot-Draznieks, C. Serre, F. Millange, J. Dutour, S. Surble and I. Margiolaki, A chromium terephthalate-based solid with unusually large pore volumes and surface area, *Science*, 2005, **309**, 2040-2042.
- 26 X. Duan, Y. Cui, Y. Yang and G. Qian, A novel methoxy-decorated metal-organic framework exhibiting high acetylene and carbon dioxide storage capacities, *CrystEngComm*, 2017, **19**, 1464-1469.
- 27 Q.-G. Zhai, X. Bu, C. Mao, X. Zhao, L. Daemen, Y. Cheng, A. J. Ramirez-Cuesta and P. Feng, An ultra-tunable platform for molecular engineering of high-performance crystalline porous materials, *Nat. Commun.*, 2016, **7**.
- 28 S. R. Caskey, A. G. Wong-Foy and A. J. Matzger, Dramatic tuning of carbon dioxide uptake via metal substitution in a coordination polymer with cylindrical pores, *J. Am. Chem. Soc.*, 2008, **130**, 10870-10871.
- 29 B. Li, Z. Zhang, Y. Li, K. Yao, Y. Zhu, Z. Deng, F. Yang, X. Zhou, G. Li, H. Wu, N. Nijem, Y. J. Chabal, Z. Lai, Y. Han, Z. Shi, S. Feng and J. Li, Enhanced Binding Affinity, Remarkable Selectivity, and High Capacity of CO<sub>2</sub> by Dual Functionalization of a rht-Type Metal-Organic Framework, *Angew. Chem. Int. Ed.*, 2012, **51**, 1412-1415.
- 30 F. Moreau, I. da Silva, N. H. Al Smail, T. L. Easun, M. Savage, H. G. W. Godfrey, S. F. Parker, P. Manuel, S. Yang and M. Schroeder, Unravelling exceptional acetylene and carbon dioxide adsorption within a tetra-amide functionalized metal-organic framework, *Nat. Commun.*, 2017, **8**.
- 31 B. Zheng, J. Bai, J. Duan, L. Wojtas and M. J. Zaworotko, Enhanced CO<sub>2</sub> Binding Affinity of a High-Uptake rht-

- Type Metal-Organic Framework Decorated with Acylamide Groups, *J. Am. Chem. Soc.*, 2011, **133**, 748-751.
- 32 Q.-G. Zhai, X. Bu, C. Mao, X. Zhao and P. Feng, Systematic and Dramatic Tuning on Gas Sorption Performance in Heterometallic Metal-Organic Frameworks, *J. Am. Chem. Soc.*, 2016, **138**, 2524-2527.
- 33 N. H. Alsmail, M. Suyetin, Y. Yan, R. Cabot, C. P. Krap, J. Lu, T. L. Easun, E. Bichoutskaia, W. Lewis, A. J. Blake and M. Schroeder, Analysis of High and Selective Uptake of CO<sub>2</sub> in an Oxamide-Containing {Cu<sub>2</sub>(OOCR)<sub>4</sub>} -Based Metal-Organic Framework, *Chem. Eur. J.*, 2014, **20**, 7317-7324.
- 34 S. D. Burd, S. Ma, J. A. Perman, B. J. Sikora, R. Q. Snurr, P. K. Thallapally, J. Tian, L. Wojtas and M. J. Zaworotko, Highly Selective Carbon Dioxide Uptake by Cu(bpy-n)<sub>2</sub>(SiF<sub>6</sub>) (bpy-1=4,4-Bipyridine; bpy-2=1,2-Bis(4-pyridyl)ethene), *J. Am. Chem. Soc.*, 2012, **134**, 3663-3666.
- 35 Y. Wang, X. Jia, H. Yang, Y. Wang, X. Chen, A. N. Hong, J. Li, X. Bu and P. Feng, A Strategy for Constructing Pore-Space-Partitioned MOFs with High Uptake Capacity for C<sub>2</sub> Hydrocarbons and CO<sub>2</sub>, *Angew. Chem. Int. Ed.*, 2020, **59**, 19027-19030.
- 36 Y. Li, H. Yi, X. Tang, F. Li and Q. Yuan, Adsorption separation of CO<sub>2</sub>/CH<sub>4</sub> gas mixture on the commercial zeolites at atmospheric pressure, *Chem. Eng. J.*, 2013, **229**, 50-56.
- 37 J. McEwen, J.-D. Hayman and A. O. Yazaydin, A comparative study of CO<sub>2</sub>, CH<sub>4</sub> and N<sub>2</sub> adsorption in ZIF-8, Zeolite-13X and BPL activated carbon, *Chem. Phys.*, 2013, **412**, 72-76.
- 38 R.-L. Tseng, F.-C. Wu and R.-S. Juang, Adsorption of CO<sub>2</sub> at atmospheric pressure on activated carbons prepared from melamine-modified phenol-formaldehyde resins, *Sep. Purif. Technol.*, 2015, **140**, 53-60.
- 39 Z. Hu, M. Khurana, Y. H. Seah, M. Zhang, Z. Guo and D. Zhao, Ionized Zr-MOFs for highly efficient post-combustion CO<sub>2</sub> capture, *Chem. Eng. Sci.*, 2015, **124**, 61-69.
- 40 Z. Zhao, Z. Li and Y. S. Lin, Adsorption and Diffusion of Carbon Dioxide on Metal-Organic Framework (MOF-5), *Ind. Eng. Chem. Res.*, 2009, **48**, 10015-10020.

- 41 L. Li, J. Yang, J. Li, Y. Chen and J. Li, Separation of CO<sub>2</sub>/CH<sub>4</sub> and CH<sub>4</sub>/N<sub>2</sub> mixtures by M/DOBDC: A detailed dynamic comparison with MIL-100(Cr) and activated carbon, *Microporous Mesoporous Mater.*, 2014, **198**, 236-246.
- 42 D. Saha, Z. Bao, F. Jia and S. Deng, Adsorption of CO<sub>2</sub>, CH<sub>4</sub>, N<sub>2</sub>O, and N<sub>2</sub> on MOF-5, MOF-177, and Zeolite 5A, *Environ. Sci. Technol.*, 2010, **44**, 1820-1826.
- 43 X. Zhang, W. Chen, W. Shi and P. Cheng, Highly selective sorption of CO<sub>2</sub> and N<sub>2</sub>O and strong gas- framework interactions in a nickel(II) organic material, *J. Mater. Chem. A*, 2016, **4**, 16198-16204.
- 44 J.-R. Li, R. J. Kuppler and H.-C. Zhou, Selective gas adsorption and separation in metal-organic frameworks, *Chem. Soc. Rev.*, 2009, **38**, 1477-1504.
- 45 L. Wang, F. Zhang, C. Wang, Y. Li, J. Yang, L. Li and J. Li, Ethylenediamine-functionalized metal organic frameworks MIL-100(Cr) for efficient CO<sub>2</sub>/N<sub>2</sub>O separation, *Sep. Purif. Technol.*, 2020, **235**.
- 46 L. Wang, Y. Li, Y. Wang, J. Yang, L. Li and J. Li, Research on CO<sub>2</sub>-N<sub>2</sub>O separation using flexible metal organic frameworks, *Sep. Purif. Technol.*, 2020, **251**.
- 47 L. Wang, F. Zhang, J. Yang, L. Li and J. Li, The efficient separation of N<sub>2</sub>O/CO<sub>2</sub> using unsaturated Fe<sup>2+</sup> sites in MIL-100Fe, *Chem. Commun.*, 2021, **57**, 6636-6639.
- 48 R. J. Marshall, C. T. Lennon, A. Tao, H. M. Senn, C. Wilson, D. Fairen-Jimenez and R. S. Forgan, Controlling interpenetration through linker conformation in the modulated synthesis of Sc metal-organic frameworks, *J. Mater. Chem. A*, 2018, **6**, 1181-1187.
